# Supplementary material for: Exploring the Safety and Efficacy of Organic Light-Emitting Diode in Skin Rejuvenation and Wound Healing
Source: PubMed Central journal article supplement — Yonsei Med J. 2024 Jan 17;65(2):98–107. doi: 10.3349/ymj.2023.0125 (PMC10827635; doi:10.3349/ymj.2023.0125), 2024-01-17
Supplement: ymj-65-98-s002.pdf [file ymj-65-98-s002.pdf]

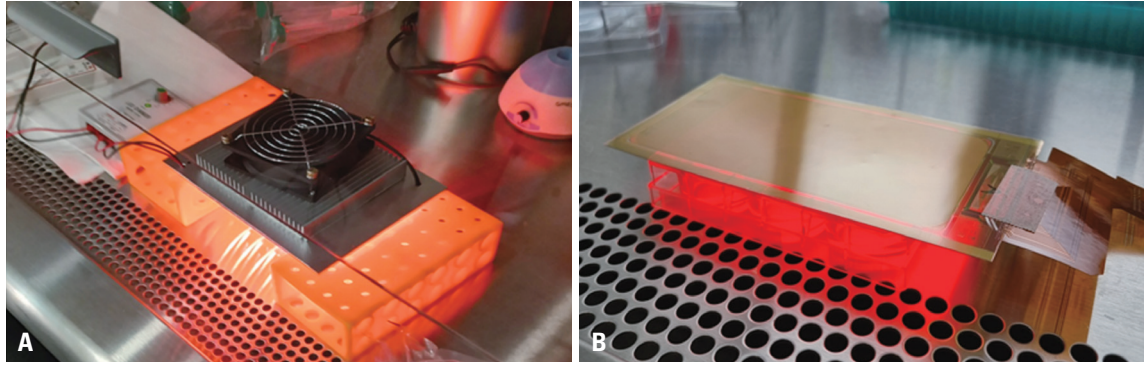

**Supplementary Fig. 1.** Laboratory setting for light source irradiation (A and B). The distance from OLED panel to the cell plate was 2 cm, whereas the distance from LED panel to the cell plate was 4 cm, as suggested by the manufacturer. A pre-designed laboratory fan was applied on the top of the LED source during the irradiation period to reduce the possible effect by the heat generated from the light source. LED, light-emitting diode; OLED, organic light-emitting diode.
