# Supplementary material for: Exploring the Safety and Efficacy of Organic Light-Emitting Diode in Skin Rejuvenation and Wound Healing
Source: PubMed Central journal article supplement — Yonsei Med J. 2024 Jan 17;65(2):98–107. doi: 10.3349/ymj.2023.0125 (PMC10827635; doi:10.3349/ymj.2023.0125), 2024-01-17
Supplement: ymj-65-98-s003.pdf [file ymj-65-98-s003.pdf]

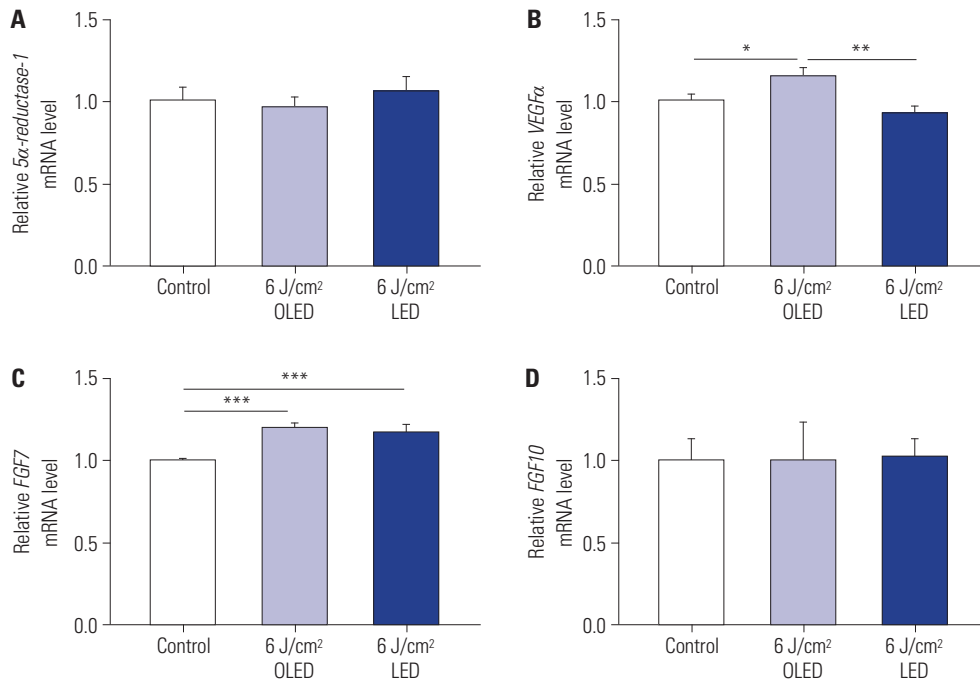

**Supplementary Fig. 2.** Relative mRNA expression levels confirming growth factor gene expressions, such as *5α-reductase-1* (A), *VEGFα* (B), *FGF7* (C), and *FGF10* (D), in the HFDPs via qRT-PCR. \* $p < 0.05$ , \*\* $p < 0.01$ , \*\*\* $p < 0.005$ , independent samples t-test. LED, light-emitting diode; OLED, organic light-emitting diode; HFDPs, hair follicle dermal papilla cells; qRT-PCR, quantitative reverse transcription polymerase chain reaction.
