# Supplementary material for: Exploring the Safety and Efficacy of Organic Light-Emitting Diode in Skin Rejuvenation and Wound Healing
Source: PubMed Central journal article supplement — Yonsei Med J. 2024 Jan 17;65(2):98–107. doi: 10.3349/ymj.2023.0125 (PMC10827635; doi:10.3349/ymj.2023.0125), 2024-01-17
Supplement: ymj-65-98-s004.pdf [file ymj-65-98-s004.pdf]

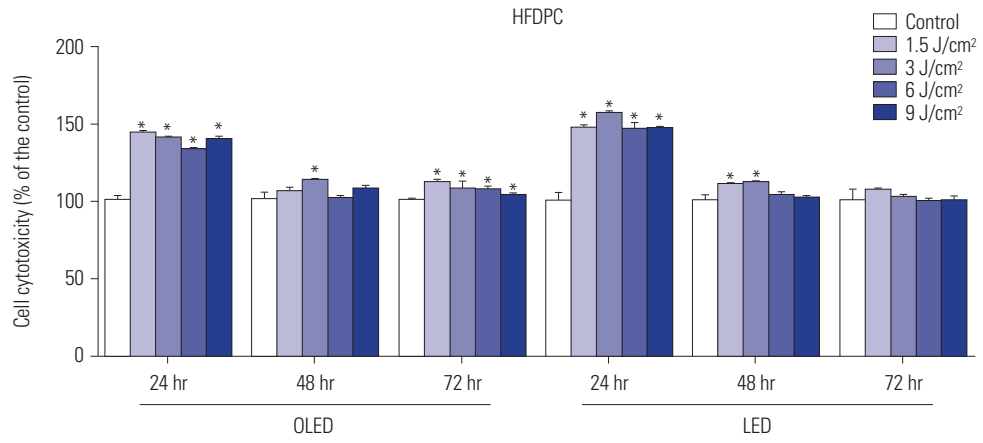

**Supplementary Fig. 3.** Safety assessment of OLED and LED light irradiation on HFDPCs were performed via confirmation of cell viability. \* $p < 0.05$ , independent samples t-test. HFDPCs, hair follicle dermal papilla cells; LED, light-emitting diode; OLED, organic light-emitting diode.
